# Supplementary material for: Tofacitinib versus tocilizumab in the treatment of biological-naïve or previous biological-failure patients with methotrexate-refractory active rheumatoid arthritis
Source: PubMed Central journal article supplement — RMD Open. 2021 May 5;7(2):e001601. doi: 10.1136/rmdopen-2021-001601 (PMC8103932; doi:10.1136/rmdopen-2021-001601), 2021-05-05
Supplement: rmdopen-2021-001601supp001.pdf [file rmdopen-2021-001601supp001.pdf]

**Table S1.** Tofacitinib vs. tocilizumab for CDAI-based improvements at 12 months in bDMARD-naïve RA patients after propensity score matching

|                                             | Unadjusted OR<br>(95% CI) * | <i>p</i> | Adjusted OR<br>(95% CI) * | <i>p</i> |
|---------------------------------------------|-----------------------------|----------|---------------------------|----------|
| For CDAI85 <sup>†</sup> (major response)    |                             |          |                           |          |
| Tofacitinib vs. tocilizumab                 | 4.10 (2.05–8.18)            | <0.001   | 3.88 (1.87–8.03)          | <0.001   |
| MTX use vs. no use                          | 1.11 (0.45–2.73)            | 0.82     | 1.13 (0.35–3.65)          | 0.83     |
| PSL use vs. no use                          | 0.47 (0.21–1.05)            | 0.065    | 0.80 (0.29–2.23)          | 0.67     |
| For CDAI70 <sup>†</sup> (moderate response) |                             |          |                           |          |
| Tofacitinib vs. tocilizumab                 | 3.18 (1.62–6.26)            | <0.001   | 2.89 (1.43–5.84)          | 0.003    |
| MTX use vs. no use                          | 1.25 (0.49–3.17)            | 0.64     | 1.09 (0.35–3.35)          | 0.89     |
| PSL use vs. no use                          | 0.45 (0.20–0.99)            | 0.050    | 0.58 (0.23–1.42)          | 0.23     |
| For CDAI50 <sup>†</sup> (minor response)    |                             |          |                           |          |
| Tofacitinib vs. tocilizumab                 | 1.69 (0.85–3.36)            | 0.13     | 1.56 (0.76–3.21)          | 0.22     |
| MTX use vs. no use                          | 0.56 (0.19–1.66)            | 0.29     | 0.64 (0.20–2.06)          | 0.46     |
| PSL use vs. no use                          | 0.57 (0.24–1.36)            | 0.21     | 0.73 (0.28–1.56)          | 0.51     |
| For MCID-based improvement <sup>‡</sup>     |                             |          |                           |          |
| Tofacitinib vs. tocilizumab                 | 1.69 (0.85–3.36)            | 0.13     | 1.56 (0.76–3.20)          | 0.22     |
| MTX use vs. no use                          | 0.56 (0.19–1.66)            | 0.29     | 0.64 (0.20–2.06)          | 0.46     |
| PSL use vs. no use                          | 0.57 (0.24–1.36)            | 0.21     | 0.73 (0.28–1.87)          | 0.51     |
| For remission (CDAI ≤2.8)                   |                             |          |                           |          |
| Tofacitinib vs. tocilizumab                 | 3.33 (1.75–6.35)            | <0.001   | 3.31 (1.69–6.48)          | <0.001   |
| MTX use vs. no use                          | 1.00 (0.40–2.52)            | 1.00     | 0.86 (0.28–2.65)          | 0.80     |
| PSL use vs. no use                          | 0.63 (0.31–1.30)            | 0.21     | 0.92 (0.38–2.22)          | 0.86     |
| For remission or low CDAI (≤10)             |                             |          |                           |          |
| Tofacitinib vs. tocilizumab                 | 2.00 (0.97–4.12)            | 0.061    | 2.05(0.93–4.52)           | 0.076    |
| MTX use vs. no use                          | 0.63 (0.20–1.91)            | 0.41     | 0.54 (0.15–1.91)          | 0.34     |
| PSL use vs. no use                          | 0.50 (0.19–1.33)            | 0.17     | 0.66 (0.23–1.94)          | 0.45     |

\*Unadjusted ORs (95% CI) of the main effect (tofacitinib vs. tocilizumab) and confounder variables (concurrent MTX and PSL use) were determined for each of the CDAI-based improvement measures according to single conditional logistic regression analysis. ORs (95% CIs) of tofacitinib vs. tocilizumab adjusted for concurrent MTX use and PSL use were calculated by conditional multivariable logistic regression analysis (a forced-entry method).

<sup>†</sup>Defined as achieving and maintaining ≥50% improvement of the CDAI (CDAI50), ≥70% (CDAI70), and ≥85% (CDAI85) during the 12-month treatment.

<sup>‡</sup>Defined as CDAI reduction >12 for patients starting with a high CDAI and CDAI reduction >6 for

those starting with a moderate CDAI at 12 months of treatment.

<sup>†‡</sup>For classification at 12 months, non-responder imputation (NRI) was used for missing data on patients who had withdrawn from the study because of lack or loss of efficacy, adverse events, and lost to follow-up.

RA, rheumatoid arthritis; bDMARD, biological disease-modifying antirheumatic drug; CDAI, clinical disease activity index; MCID, minimal clinically important difference; MTX, methotrexate; PSL, prednisolone; OR, odds ratio; 95% CI, 95% confidence interval
