# Supplementary material for: Tofacitinib versus tocilizumab in the treatment of biological-naïve or previous biological-failure patients with methotrexate-refractory active rheumatoid arthritis
Source: PubMed Central journal article supplement — RMD Open. 2021 May 5;7(2):e001601. doi: 10.1136/rmdopen-2021-001601 (PMC8103932; doi:10.1136/rmdopen-2021-001601), 2021-05-05
Supplement: rmdopen-2021-001601supp002.pdf [file rmdopen-2021-001601supp002.pdf]

**Table S2.** Tofacitinib vs. tocilizumab for CDAI-based improvements at 12 months in previous bDMARD-failure RA patients after propensity score matching

|                                             | Unadjusted OR<br>(95% CI) * | <i>p</i> | Adjusted OR<br>(95% CI) * | <i>p</i> |
|---------------------------------------------|-----------------------------|----------|---------------------------|----------|
| For CDAI85 <sup>†</sup> (major response)    |                             |          |                           |          |
| Tofacitinib vs. tocilizumab                 | 0.77 (0.37–1.57)            | 0.47     | 0.65 (0.29–1.45)          | 0.29     |
| MTX use vs. no use                          | 0.70 (0.27–1.84)            | 0.47     | 0.41 (0.12–1.41)          | 0.16     |
| PSL use vs. no use                          | 0.58 (0.23–1.48)            | 0.26     | 0.39 (0.12–1.21)          | 0.10     |
| For CDAI70 <sup>†</sup> (moderate response) |                             |          |                           |          |
| Tofacitinib vs. tocilizumab                 | 1.05 (0.56–1.97)            | 0.87     | 0.96 (0.49–1.88)          | 0.90     |
| MTX use vs. no use                          | 0.75 (0.32–1.78)            | 0.51     | 0.69 (0.27–1.77)          | 0.44     |
| PSL use vs. no use                          | 0.77 (0.34–1.75)            | 0.53     | 0.72 (0.31–1.68)          | 0.44     |
| For CDAI50 <sup>†</sup> (minor response)    |                             |          |                           |          |
| Tofacitinib vs. tocilizumab                 | 1.44 (0.79–2.63)            | 0.23     | 1.32 (0.70–2.48)          | 0.39     |
| MTX use vs. no use                          | 0.62 (0.26–1.48)            | 0.28     | 0.69 (0.28–1.75)          | 0.44     |
| PSL use vs. no use                          | 0.71 (0.32–1.61)            | 0.42     | 0.75 (0.33–1.72)          | 0.50     |
| For MCID-based improvement <sup>‡</sup>     |                             |          |                           |          |
| Tofacitinib vs. tocilizumab                 | 1.67 (0.93–2.99)            | 0.09     | 1.46 (0.79–2.73)          | 0.23     |
| MTX use vs. no use                          | 0.53 (0.23–1.26)            | 0.15     | 0.65 (0.26–1.61)          | 0.35     |
| PSL use vs. no use                          | 0.63 (0.28–1.38)            | 0.24     | 0.69 (0.30–1.56)          | 0.37     |
| For remission (CDAI ≤2.8)                   |                             |          |                           |          |
| Tofacitinib vs. tocilizumab                 | 0.83 (0.36–1.93)            | 0.67     | 0.77 (0.32–1.86)          | 0.56     |
| MTX use vs. no use                          | 1.20 (0.37–3.93)            | 0.76     | 0.87 (0.23–3.30)          | 0.83     |
| PSL use vs. no use                          | 0.56 (0.19–1.66)            | 0.29     | 0.50 (0.15–1.72)          | 0.27     |
| For remission or low CDAI (≤10)             |                             |          |                           |          |
| Tofacitinib vs. tocilizumab                 | 1.88 (1.04–3.39)            | 0.035    | 1.67 (0.90–3.12)          | 0.11     |
| MTX use vs. no use                          | 0.60 (0.26–1.37)            | 0.23     | 0.66 (0.26–1.65)          | 0.37     |
| PSL use vs. no use                          | 0.53 (0.23–1.26)            | 0.15     | 0.53 (0.21–1.34)          | 0.18     |

\*Unadjusted ORs (95% CI) of the main effect (tofacitinib vs. tocilizumab) and confounder variables (concurrent MTX and PSL use) were determined for each of the CDAI-based improvement measures according to single conditional logistic regression analysis. ORs (95% CIs) of tofacitinib vs. tocilizumab adjusted for concurrent MTX use and PSL use were calculated by conditional multivariable logistic regression analysis (a forced-entry method).

<sup>†</sup>Defined as achieving and maintaining ≥50% improvement of the CDAI (CDAI50), ≥70% (CDAI70), and ≥85% (CDAI85) during the 12-month treatment.

<sup>‡</sup>Defined as CDAI reduction >12 for patients starting with a high CDAI and CDAI reduction >6 for

those starting with a moderate CDAI at 12 months of treatment.

<sup>†‡</sup>For classification at 12 months, non-responder imputation (NRI) was used for missing data on patients who had withdrawn from the study because of lack or loss of efficacy, adverse events, and lost to follow-up.

RA, rheumatoid arthritis; bDMARD, biological disease-modifying antirheumatic drug; CDAI, clinical disease activity index; MCID, minimal clinically important difference; MTX, methotrexate; PSL, prednisolone; OR, odds ratio; 95% CI, 95% confidence interval
