# Supplementary material for: Tofacitinib versus tocilizumab in the treatment of biological-naïve or previous biological-failure patients with methotrexate-refractory active rheumatoid arthritis
Source: PubMed Central journal article supplement — RMD Open. 2021 May 5;7(2):e001601. doi: 10.1136/rmdopen-2021-001601 (PMC8103932; doi:10.1136/rmdopen-2021-001601), 2021-05-05
Supplement: rmdopen-2021-001601supp004.pdf [file rmdopen-2021-001601supp004.pdf]

**Table S4.** Tofacitinib vs. tocilizumab: comparison of CDAI-based improvements at 12 months in RA patients after propensity score matching

|                                         | bDMARD-naïve RA patients |          |                  |          | Previous bDMARD-failure RA patients |          |                  |          |
|-----------------------------------------|--------------------------|----------|------------------|----------|-------------------------------------|----------|------------------|----------|
|                                         | Unadjusted OR*           | <i>p</i> | Adjusted OR*     | <i>p</i> | Unadjusted OR*                      | <i>p</i> | Adjusted OR*     | <i>p</i> |
|                                         | (95% CI)                 |          | (95% CI)         |          | (95% CI)                            |          | (95% CI)         |          |
| Remission (CDAI ≤2.8)                   | 2.85 (1.51–5.35)         | 0.001    | 2.90 (1.49–5.66) | 0.002    | 0.85 (0.38–1.89)                    | 0.68     | 0.74 (0.31–1.77) | 0.50     |
| Remission or low CDAI (≤10)             | 2.00 (0.90–4.45)         | 0.090    | 2.05 (0.88–4.77) | 0.090    | 1.61 (0.89–2.90)                    | 0.11     | 1.47 (0.79–2.73) | 0.22     |
| CDAI85 <sup>†</sup> (major response)    | 3.80 (1.89–7.63)         | <0.001   | 3.61 (1.73–7.51) | <0.001   | 0.78 (0.39–1.56)                    | 0.48     | 0.63 (0.28–1.40) | 0.26     |
| CDAI70 <sup>†</sup> (moderate response) | 2.91 (1.47–5.77)         | 0.002    | 2.65 (1.30–5.39) | 0.007    | 0.90 (0.49–1.68)                    | 0.75     | 0.81 (0.42–1.60) | 0.56     |
| CDAI50 <sup>†</sup> (minor response)    | 1.31 (0.64–2.69)         | 0.47     | 1.33 (0.62–2.84) | 0.47     | 1.41 (0.76–2.63)                    | 0.28     | 1.29 (0.67–2.49) | 0.44     |
| MCID-based improvement <sup>‡</sup>     | 1.80 (0.83–3.90)         | 0.14     | 1.82 (0.82–4.04) | 0.14     | 1.79 (0.93–3.44)                    | 0.08     | 1.64 (0.81–3.31) | 0.17     |

\*Unadjusted ORs (95% CI) of tofacitinib vs. tocilizumab were determined for each of the CDAI-based improvement measures according to single conditional logistic regression analyses. ORs (95% CIs) of tofacitinib vs. tocilizumab were adjusted for concurrent MTX use and PSL use by conditional multivariable logistic regression analysis.

<sup>†</sup>Defined as achieving and maintaining ≥50% improvement of CDAI (CDAI50), ≥70% (CDAI70), and ≥85% (CDAI85) during the 12-month treatment.

<sup>‡</sup>Defined as CDAI reduction >12 for patients starting with a high CDAI and CDAI reduction >6 for those starting with a moderate CDAI at 12 months of treatment.

RA, rheumatoid arthritis; bDMARD, biological disease-modifying antirheumatic drug; MTX, methotrexate, PSL, prednisolone; CDAI, clinical disease activity index; MCID, minimal clinically important difference; OR, odds ratio; 95% CI, 95% confidence interval
