# Supplementary material for: Tofacitinib versus tocilizumab in the treatment of biological-naïve or previous biological-failure patients with methotrexate-refractory active rheumatoid arthritis
Source: PubMed Central journal article supplement — RMD Open. 2021 May 5;7(2):e001601. doi: 10.1136/rmdopen-2021-001601 (PMC8103932; doi:10.1136/rmdopen-2021-001601), 2021-05-05
Supplement: rmdopen-2021-001601supp005.pdf [file rmdopen-2021-001601supp005.pdf]

**Table S5.** Effects of the number of previous failures to bDMARDs on CDAI-based improvements in 12-month tofacitinib treatment

|                                             | Unadjusted OR<br>(95% CI) * | <i>p</i> | Adjusted OR<br>(95% CI) * | <i>p</i> |
|---------------------------------------------|-----------------------------|----------|---------------------------|----------|
| For CDAI85 <sup>†</sup> (major response)    |                             |          |                           |          |
| 2- or 3-class failure vs. 1-class failure   | 1.25 (0.56–2.82)            | 0.59     | 1.33 (0.58–3.06)          | 0.50     |
| Baseline CDAI per 1 unit more               | 1.01 (0.98–1.05)            | 0.51     | 1.02 (0.98–1.06)          | 0.44     |
| For CDAI70 <sup>†</sup> (moderate response) |                             |          |                           |          |
| 2- or 3-class failure vs. 1-class failure   | 1.51 (0.78–2.92)            | 0.22     | 1.56 (0.79–3.06)          | 0.20     |
| Baseline CDAI per 1 unit more               | 1.00 (0.97–1.04)            | 0.80     | 1.01 (0.98–1.04)          | 0.62     |
| For CDAI50 <sup>†</sup> (minor response)    |                             |          |                           |          |
| 2- or 3-class failure vs. 1-class failure   | 1.05 (0.56–1.98)            | 0.88     | 1.14 (0.60–2.18)          | 0.69     |
| Baseline CDAI per 1 unit more               | 1.02 (0.99–1.05)            | 0.21     | 1.02 (0.99–1.04)          | 0.19     |
| For MCID-based improvement <sup>‡</sup>     |                             |          |                           |          |
| 2- or 3-class failure vs. 1-class failure   | 1.29 (0.68–2.45)            | 0.43     | 1.38 (0.72–2.65)          | 0.34     |
| Baseline CDAI per 1 unit more               | 1.01 (0.98–1.05)            | 0.42     | 1.02 (0.98–1.05)          | 0.33     |
| For remission (CDAI ≤2.8)                   |                             |          |                           |          |
| 2- or 3-class failure vs. 1-class failure   | 1.44 (0.60–3.49)            | 0.41     | 1.23 (0.50–3.04)          | 0.65     |
| Baseline CDAI per 1 unit more               | 0.95 (0.90–1.00)            | 0.06     | 0.95 (0.90–1.00)          | 0.07     |
| For remission or low CDAI                   |                             |          |                           |          |
| 2- or 3-class failure vs. 1-class failure   | 1.98 (1.04–3.77)            | 0.04     | 1.69 (0.86–3.29)          | 0.13     |
| Baseline CDAI per 1 unit more               | 0.94 (0.91–0.98)            | 0.001    | 0.95 (0.91–0.98)          | 0.003    |

\*Unadjusted ORs (95% CI) of the main effect (2- or 3-class failure vs. 1-class failure) and a confounder variable (baseline CDAI) were determined for each of the CDAI-based improvement measures according to univariable logistic regression analysis. ORs (95% CIs) of 2- or 3-class failure vs. 1-class failure adjusted for the baseline CDAI were calculated by multivariable logistic regression analysis (a forced-entry method).

<sup>†</sup>Defined as achieving and maintaining ≥50% improvement of the CDAI (CDAI50), ≥70% (CDAI70), and ≥85% (CDAI85) during the 12-month treatment.

<sup>‡</sup>Defined as CDAI reduction >12 for patients starting with a high CDAI and CDAI reduction >6 for those starting with a moderate CDAI at 12 months of treatment.

<sup>†‡</sup>For classification at 12 months, non-responder imputation (NRI) was used for missing data on patients who had withdrawn from the study because of lack or loss of efficacy, adverse events, and lost to follow-up.

bDMARD, biological disease-modifying antirheumatic drug; CDAI, clinical disease activity index; MCID, minimal clinically important difference; OR, odds ratio; 95% CI, 95% confidence interval
