# Supplementary material for: Tofacitinib versus tocilizumab in the treatment of biological-naïve or previous biological-failure patients with methotrexate-refractory active rheumatoid arthritis
Source: PubMed Central journal article supplement — RMD Open. 2021 May 5;7(2):e001601. doi: 10.1136/rmdopen-2021-001601 (PMC8103932; doi:10.1136/rmdopen-2021-001601), 2021-05-05
Supplement: rmdopen-2021-001601supp006.pdf [file rmdopen-2021-001601supp006.pdf]

**Table S6.** Adverse events that caused discontinuation of tofacitinib or tocilizumab in RA patients, grouped by the status of previous bDMARD use

|                                                                         | bDMARD-naïve patients             |                          | Previous bDMARD-failure patients                              |                         |
|-------------------------------------------------------------------------|-----------------------------------|--------------------------|---------------------------------------------------------------|-------------------------|
|                                                                         | Tofacitinib<br>(n = 93)           | Tocilizumab<br>(n = 122) | Tofacitinib<br>(n = 154)                                      | Tocilizumab<br>(n = 95) |
| Overall adverse events, number (%)                                      | 7 (7.5)                           | 7 (5.7)                  | 15 (9.7)                                                      | 5 (5.3)                 |
| Blood and lymphatic system disorders                                    | –                                 | –                        | Lymphopenia (4)                                               | –                       |
| Cardiac disorders                                                       | –                                 | –                        | –                                                             | Heart failure           |
| Ear and labyrinth disorders                                             | –                                 | –                        | –                                                             | –                       |
| Gastrointestinal disorders                                              | –                                 | Intestinal perforation   | –                                                             | Hemorrhagic enteritis   |
| General disorders/administration site conditions                        | Anorexia (2)                      | –                        | Anorexia                                                      | –                       |
| Infections and infestations                                             | Urinary tract infection           | Bacterial pneumonia (2)  | Bacterial pneumonia (2)<br>Bronchitis<br>Bacteremia           | Empyema                 |
| Metabolism and nutrition disorders                                      | –                                 | –                        | –                                                             | –                       |
| Musculoskeletal and connective tissue disorders                         | Myositis<br>Spinal canal stenosis | –                        | PMR                                                           | –                       |
| Neoplasm benign, malignant, and unspecified, including cysts and polyps | –                                 | Cholangiocarcinoma       | Skin cancer<br>Parotid gland cancer<br>Gastric adenoma<br>CML | Stomach cancer          |
| Nervous system disorders                                                | –                                 | Cerebral hemorrhage      | –                                                             | –                       |
| Psychiatric disorders                                                   | –                                 | –                        | –                                                             | Dementia                |
| Respiratory, thoracic, and mediastinal disorders                        | OP                                | –                        | Interstitial pneumonia                                        | –                       |
| Skin and subcutaneous tissue disorders                                  | Generalized rash                  | Eruption (2)             | –                                                             | –                       |

Events are listed according to the system organ classes in the Medical Dictionary for Regulatory Activities (MedDRA) version 20.0. The numbers in parentheses represent event numbers. There was no significant difference in the rate of overall adverse events between tofacitinib and tocilizumab treatment

for bDMARD-naïve patients ( $p = 0.78$ ) or failure patients ( $p = 0.24$ ).

RA, rheumatoid arthritis; bDMARD, biological disease-modifying antirheumatic drug; PMR, polymyalgia rheumatica; CML chronic myelocytic leukemia;

OP, organizing pneumonia
