# Supplementary material for: Tofacitinib versus tocilizumab in the treatment of biological-naïve or previous biological-failure patients with methotrexate-refractory active rheumatoid arthritis
Source: PubMed Central journal article supplement — RMD Open. 2021 May 5;7(2):e001601. doi: 10.1136/rmdopen-2021-001601 (PMC8103932; doi:10.1136/rmdopen-2021-001601), 2021-05-05
Supplement: rmdopen-2021-001601supp007.pdf [file rmdopen-2021-001601supp007.pdf]

**Table S7.** Balance in baseline covariates of tofacitinib-treated and tocilizumab-treated RA patients, grouped by the status of previous bDMARD use, after IPTW adjustment

|                    | bDMARD-naïve patients (n = 215) |            | Previous bDMARD-failure patients (n = 249) |            |
|--------------------|---------------------------------|------------|--------------------------------------------|------------|
|                    | Tofacitinib versus tocilizumab  |            | Tofacitinib versus tocilizumab             |            |
|                    | ASD*                            |            | ASD*                                       |            |
|                    | Before IPTW                     | After IPTW | Before IPTW                                | After IPTW |
| Age                | 0.088                           | 0.030      | 0.43                                       | 0.035      |
| Male sex           | 0.20                            | 0.038      | 0.051                                      | 0.006      |
| RA duration        | 0.10                            | 0.010      | 0.29                                       | 0.069      |
| Advanced stages    | 0.11                            | 0.009      | 0.17                                       | 0.016      |
| Anti-CCP-positive  | 0.095                           | 0.031      | 0.007                                      | 0.005      |
| RF-positive        | 0.15                            | 0.024      | 0.049                                      | 0.018      |
| CDAI               | 0.030                           | 0.024      | 0.050                                      | 0.055      |
| Concurrent MTX use | 0.11                            | 0.040      | 0.25                                       | 0.016      |
| Concurrent PSL use | 0.41                            | 0.026      | 0.33                                       | 0.007      |

\*Balance in each of the baseline covariates was checked between the tofacitinib and tocilizumab groups before and after IPTW adjustment, separately in bDMARD-naïve patients and bDMARD-failure patients. ASD of <0.10 indicates that the baseline covariates were well balanced between the two treatment groups.

RA, rheumatoid arthritis; bDMARD, biological disease-modifying antirheumatic drug; anti-CCP, anti-cyclic citrullinated peptide antibodies; RF, rheumatoid factor; MTX, methotrexate; PSL, prednisolone; CDAI, clinical disease activity index; IPTW, inverse probability of treatment weighting; ASD, absolute standardized difference
