# Supplementary material for: Tofacitinib versus tocilizumab in the treatment of biological-naïve or previous biological-failure patients with methotrexate-refractory active rheumatoid arthritis
Source: PubMed Central journal article supplement — RMD Open. 2021 May 5;7(2):e001601. doi: 10.1136/rmdopen-2021-001601 (PMC8103932; doi:10.1136/rmdopen-2021-001601), 2021-05-05
Supplement: rmdopen-2021-001601supp008.pdf [file rmdopen-2021-001601supp008.pdf]

**Table S8.** Baseline characteristics of all tofacitinib-treated and tocilizumab-treated RA patients in the cohort, grouped by the status of previous bDMARD use, before IPTW adjustment

|                                                   | bDMARD-naïve patients (n = 274) |                          |       | Previous bDMARD-experienced patients <sup>†</sup> (n = 329) |                          |       |
|---------------------------------------------------|---------------------------------|--------------------------|-------|-------------------------------------------------------------|--------------------------|-------|
|                                                   | Tofacitinib<br>(n = 100)        | Tocilizumab<br>(n = 174) | ASD*  | Tofacitinib<br>(n = 201)                                    | Tocilizumab<br>(n = 128) | ASD*  |
| Age, years, mean (SD)                             | 64.4 (13.6)                     | 66.1 (12.8)              | 0.13  | 67.1 (11.3)                                                 | 63.4 (12.4)              | 0.31  |
| Male sex, number (%)                              | 22 (22.0)                       | 52 (29.9)                | 0.18  | 45 (22.4)                                                   | 28 (21.9)                | 0.012 |
| RA duration, years, mean (SD)                     | 9.2 (11.2)                      | 7.8 (8.6)                | 0.14  | 13.8 (9.5)                                                  | 11.2 (9.3)               | 0.28  |
| Advanced stage <sup>‡</sup> , number (%)          | 34 (34.0)                       | 56 (32.2)                | 0.040 | 121 (60.2)                                                  | 66 (51.6)                | 0.17  |
| Anti-CCP-positive, number (%)                     | 84 (84.0)                       | 143 (82.2)               | 0.050 | 177 (88.1)                                                  | 111 (86.7)               | 0.040 |
| RF-positive, number (%)                           | 87 (87.0)                       | 143 (82.2)               | 0.13  | 171 (85.1)                                                  | 109 (85.2)               | 0.002 |
| CDAI, mean (SD)                                   | 22.8 (9.4)                      | 23.7 (10.1)              | 0.090 | 22.7 (10.3)                                                 | 22.5 (10.2)              | 0.028 |
| Previous MTX failure, number (%)                  | 92 (92.0)                       | 122 (70.1)               | 0.58  | 181 (90.0)                                                  | 117 (91.4)               | 0.047 |
| Previous bDMARD failure <sup>†</sup> , number (%) | 0                               | 0                        | –     | 168 (83.6)                                                  | 105 (82.0)               | 0.041 |
| Concurrent MTX use, number (%)                    | 62 (62.0)                       | 82 (47.1)                | 0.30  | 106 (52.7)                                                  | 78 (60.9)                | 0.17  |
| Concurrent PSL use, number (%)                    | 28 (28.0)                       | 87 (50.0)                | 0.46  | 53 (26.4)                                                   | 58 (45.3)                | 0.40  |

\*Balance in each of the baseline characteristics was examined between the tofacitinib and tocilizumab groups, separately in bDMARD-naïve patients and bDMARD-experienced patients. ASD of <0.1 indicates that the baseline characteristic was well balanced between the two treatment groups.

<sup>†</sup>Previous bDMARD-experienced patients were defined as those who had previously discontinued bDMARD therapy due to intolerance or lack/loss of efficacy.

Previous bDMARD failure was defined as previous discontinuation of bDMARD therapy due to lack or loss of efficacy.

<sup>‡</sup>Advanced stage was defined as Steinbrocker radiological stages III and IV.

RA, rheumatoid arthritis; bDMARD, biological disease-modifying antirheumatic drug; anti-CCP, anti-cyclic citrullinated peptide antibodies; RF, rheumatoid factor; MTX, methotrexate; PSL, prednisolone; CDAI, clinical disease activity index; SD, standard deviation; ASD: absolute standardized

difference
