# Supplementary material for: Tofacitinib versus tocilizumab in the treatment of biological-naïve or previous biological-failure patients with methotrexate-refractory active rheumatoid arthritis
Source: PubMed Central journal article supplement — RMD Open. 2021 May 5;7(2):e001601. doi: 10.1136/rmdopen-2021-001601 (PMC8103932; doi:10.1136/rmdopen-2021-001601), 2021-05-05
Supplement: rmdopen-2021-001601supp009.pdf [file rmdopen-2021-001601supp009.pdf]

**Table S9.** Balance in baseline covariates of all tofacitinib-treated and tocilizumab-treated RA patients in the cohort, grouped by the status of previous bDMARD use, after IPTW adjustment

|                         | bDMARD-naïve patients (n = 274) |            | Previous bDMARD-experienced patients (n = 329) |            |
|-------------------------|---------------------------------|------------|------------------------------------------------|------------|
|                         | Tofacitinib versus tocilizumab  |            | Tofacitinib versus tocilizumab                 |            |
|                         | ASD*                            |            | ASD*                                           |            |
|                         | Before IPTW                     | After IPTW | Before IPTW                                    | After IPTW |
| Age                     | 0.13                            | 0.050      | 0.31                                           | 0.005      |
| Male sex                | 0.18                            | 0.040      | 0.012                                          | 0.025      |
| RA duration             | 0.14                            | 0.020      | 0.28                                           | 0.012      |
| Advanced stages         | 0.040                           | 0.050      | 0.17                                           | 0.011      |
| Anti-CCP-positive       | 0.050                           | 0.010      | 0.040                                          | 0.001      |
| RF-positive             | 0.13                            | 0.010      | 0.002                                          | 0.006      |
| CDAI                    | 0.090                           | 0.030      | 0.047                                          | 0.034      |
| Previous MTX failure    | 0.58                            | 0.030      | 0.047                                          | 0.049      |
| Previous bDMARD failure | –                               | –          | 0.041                                          | 0.005      |
| Concurrent MTX use      | 0.30                            | 0.030      | 0.17                                           | 0.004      |
| Concurrent PSL use      | 0.46                            | 0.030      | 0.40                                           | 0.017      |

\*Balance in each of the baseline covariates was checked between the tofacitinib and tocilizumab groups before and after IPTW adjustment, separately in bDMARD-naïve patients and bDMARD-failure patients. ASD of <0.10 indicates that the baseline covariates were well balanced between the two treatment groups.

RA, rheumatoid arthritis; bDMARD, biological disease-modifying antirheumatic drug; anti-CCP, anti-cyclic citrullinated peptide antibodies; RF, rheumatoid factor; MTX, methotrexate; PSL, prednisolone; CDAI, clinical disease activity index; IPTW, inverse probability of treatment weighting; ASD, absolute standardized difference
