# Supplementary material for: Tofacitinib versus tocilizumab in the treatment of biological-naïve or previous biological-failure patients with methotrexate-refractory active rheumatoid arthritis
Source: PubMed Central journal article supplement — RMD Open. 2021 May 5;7(2):e001601. doi: 10.1136/rmdopen-2021-001601 (PMC8103932; doi:10.1136/rmdopen-2021-001601), 2021-05-05
Supplement: rmdopen-2021-001601supp010.pdf [file rmdopen-2021-001601supp010.pdf]

**Table S10.** Tofacitinib vs. tocilizumab: comparison of CDAI-based improvements at 12 months in all RA patients in the cohort after IPTW adjustment

|                                         | bDMARD-naïve RA patients |          | Previous bDMARD-failure RA patients |          |
|-----------------------------------------|--------------------------|----------|-------------------------------------|----------|
|                                         | Adjusted OR* (95% CI)    | <i>p</i> | Adjusted OR* (95% CI)               | <i>p</i> |
| Remission (CDAI ≤2.8)                   | 2.62 (1.46–4.71)         | 0.001    | 1.14 (0.60–2.15)                    | 0.69     |
| Remission or low CDAI (≤10)             | 2.08 (1.11–3.90)         | 0.022    | 1.58 (0.98–2.55)                    | 0.058    |
| CDAI85 <sup>†</sup> (major response)    | 3.13 (1.73–5.64)         | <0.001   | 0.76 (0.43–1.37)                    | 0.36     |
| CDAI70 <sup>†</sup> (moderate response) | 3.05 (1.69–5.53)         | 0.001    | 1.16 (0.70–1.91)                    | 0.56     |
| CDAI50 <sup>†</sup> (minor response)    | 1.70 (0.92–3.15)         | 0.090    | 1.48 (0.92–2.39)                    | 0.10     |
| MCID-based improvement <sup>‡</sup>     | 1.72 (0.92–3.21)         | 0.087    | 1.51 (0.94–2.43)                    | 0.087    |

\* IPTW-adjusted ORs (95% CI) of tofacitinib vs. tocilizumab were determined for each of the CDAI-based improvement measures according to univariable logistic regression analyses.

<sup>†</sup>Defined as achieving and maintaining ≥50% improvement of CDAI (CDAI50), ≥70% (CDAI70), and ≥85% (CDAI85) during the 12-month treatment.

<sup>‡</sup>Defined as CDAI reduction >12 for patients starting with a high CDAI and CDAI reduction >6 for those starting with a moderate CDAI at 12 months of treatment.

RA, rheumatoid arthritis; bDMARD, biological disease-modifying antirheumatic drug; CDAI, clinical disease activity index; MCID, minimal clinically important difference; IPTW, inverse probability of treatment weighting; OR, odds ratio; 95% CI, 95% confidence interval
