# Supplementary material for: Tofacitinib versus tocilizumab in the treatment of biological-naïve or previous biological-failure patients with methotrexate-refractory active rheumatoid arthritis
Source: PubMed Central journal article supplement — RMD Open. 2021 May 5;7(2):e001601. doi: 10.1136/rmdopen-2021-001601 (PMC8103932; doi:10.1136/rmdopen-2021-001601), 2021-05-05
Supplement: rmdopen-2021-001601supp011.pdf [file rmdopen-2021-001601supp011.pdf]

**Table S11.** Balance in the use of MTX and PSL at each timepoint in bDMARD-naïve patients (n = 215), after time-varying IPTW adjustment

|                         | Before IPTW adjustment |             |       | After IPTW adjustment |             |       |
|-------------------------|------------------------|-------------|-------|-----------------------|-------------|-------|
|                         | Tofacitinib            | Tocilizumab | ASD*  | Tofacitinib           | Tocilizumab | ASD*  |
| Age, years              | 63.6                   | 64.8        | 0.090 | 64.8                  | 64.5        | 0.023 |
| Male sex, %             | 22                     | 32          | 0.23  | 31                    | 29          | 0.048 |
| RA duration, years      | 8.8                    | 7.8         | 0.11  | 8.5                   | 8.4         | 0.007 |
| Advanced stage, %       | 33                     | 27          | 0.14  | 31                    | 30          | 0.021 |
| Anti-CCP-positive, %    | 84                     | 80          | 0.11  | 85                    | 82          | 0.072 |
| RF-positive, %          | 87                     | 81          | 0.19  | 88                    | 85          | 0.083 |
| Initial CDAI            | 22.7                   | 23.0        | 0.048 | 22.8                  | 22.9        | 0.008 |
| MTX use at baseline, %  | 68                     | 62          | 0.12  | 60                    | 64          | 0.081 |
| MTX use at 3 months, %  | 73                     | 57          | 0.33  | 60                    | 62          | 0.051 |
| MTX use at 6 months, %  | 70                     | 57          | 0.25  | 59                    | 61          | 0.032 |
| MTX use at 9 months, %  | 67                     | 52          | 0.32  | 53                    | 56          | 0.056 |
| MTX use at 11 months, % | 72                     | 56          | 0.34  | 59                    | 61          | 0.031 |
| PSL use at baseline, %  | 29                     | 53          | 0.51  | 43                    | 43          | 0.014 |
| PSL use at 3 months, %  | 26                     | 47          | 0.44  | 36                    | 37          | 0.015 |
| PSL use at 6 months, %  | 18                     | 34          | 0.37  | 27                    | 27          | 0.007 |
| PSL use at 9 months, %  | 16                     | 31          | 0.35  | 24                    | 24          | 0.010 |
| PSL use at 11 months, % | 12                     | 33          | 0.25  | 28                    | 28          | 0.016 |

\*Balance in baseline covariates as well as use of MTX and PSL at each timepoint are shown between the tofacitinib and tocilizumab groups in bDMARD-naïve patients before and after time-varying IPTW adjustment. ASD of <0.10 indicates that the covariates

were well balanced between the two treatment groups. Missing data on dropout patients were handled using the multiple imputation method.

RA, rheumatoid arthritis; bDMARD, biological disease-modifying antirheumatic drug; anti-CCP, anti-cyclic citrullinated peptide antibodies; RF, rheumatoid factor; MTX, methotrexate; PSL, prednisolone; CDAI, clinical disease activity index; IPTW, inverse probability of treatment weighting; ASD, absolute standardized difference
