# Supplementary material for: Tofacitinib versus tocilizumab in the treatment of biological-naïve or previous biological-failure patients with methotrexate-refractory active rheumatoid arthritis
Source: HighWire-hosted journal article supplement (doi:10.1136/rmdopen-2021-001601), 2021-05-01
Supplement: rmdopen-2021-001601supp012_data_supplement.pdf [file rmdopen-2021-001601supp012_data_supplement.pdf]

**Table S12.** Balance in the use of MTX and PSL at each timepoint in previous bDMARD-failure patients (n = 249), after time-varying IPTW adjustment

|                         | Before IPTW adjustment |             |       | After IPTW adjustment |             |       |
|-------------------------|------------------------|-------------|-------|-----------------------|-------------|-------|
|                         | Tofacitinib            | Tocilizumab | ASD*  | Tofacitinib           | Tocilizumab | ASD*  |
| Age, years              | 66.7                   | 61.6        | 0.43  | 64.8                  | 63.9        | 0.075 |
| Male sex, %             | 21                     | 19          | 0.051 | 20                    | 18          | 0.043 |
| RA duration, years      | 13.9                   | 11.2        | 0.29  | 12.8                  | 12.5        | 0.035 |
| Advanced stage, %       | 63                     | 53          | 0.17  | 58                    | 58          | 0.006 |
| Anti-CCP-positive, %    | 88                     | 87          | 0.007 | 88                    | 88          | 0.013 |
| RF-positive, %          | 83                     | 85          | 0.049 | 84                    | 84          | 0.012 |
| Initial CDAI            | 23.1                   | 22.6        | 0.050 | 23.6                  | 24.1        | 0.054 |
| MTX use at baseline, %  | 55                     | 70          | 0.25  | 59                    | 61          | 0.034 |
| MTX use at 3 months, %  | 56                     | 65          | 0.18  | 59                    | 60          | 0.021 |
| MTX use at 6 months, %  | 51                     | 53          | 0.040 | 50                    | 48          | 0.022 |
| MTX use at 9 months, %  | 51                     | 55          | 0.082 | 51                    | 51          | 0.004 |
| MTX use at 11 months, % | 45                     | 47          | 0.038 | 45                    | 45          | 0.006 |
| PSL use at baseline, %  | 27                     | 46          | 0.33  | 36                    | 40          | 0.072 |
| PSL use at 3 months, %  | 38                     | 47          | 0.20  | 41                    | 42          | 0.027 |
| PSL use at 6 months, %  | 37                     | 41          | 0.083 | 38                    | 38          | 0.010 |
| PSL use at 9 months, %  | 42                     | 45          | 0.074 | 42                    | 43          | 0.020 |
| PSL use at 11 months, % | 39                     | 51          | 0.23  | 42                    | 43          | 0.016 |

\*Balance in baseline covariates as well as use of MTX and PSL at each timepoint was checked between the tofacitinib and tocilizumab groups before and after time-varying IPTW adjustment in previous bDMARD-failure patients. ASD of <0.10 indicates

that the covariates were well balanced between the two treatment groups. Missing data on dropout patients at each timepoint were handled using the multiple imputation method.

RA, rheumatoid arthritis; bDMARD, biological disease-modifying antirheumatic drug; anti-CCP, anti-cyclic citrullinated peptide antibodies; RF, rheumatoid factor; MTX, methotrexate; PSL, prednisolone; CDAI, clinical disease activity index; IPTW, inverse probability of treatment weighting; ASD, absolute standardized difference
